# Supplementary material for: Optimization of Ultrasonic Extraction Parameters for the Recovery of Phenolic Compounds in Brown Seaweed: Comparison with Conventional Techniques
Source: MDPI journal article supplement (doi:10.3390/antiox13040409), 2024-03-28
Supplement: s1 [file s1]

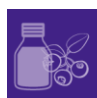**Table S1.** Experimental design for free phenolic extractions.

| RunOrder | Amplitude (%) | Time (min) | Solvent : solid ratio |
|----------|---------------|------------|-----------------------|
| 1        | 40            | 8          | 15                    |
| 2        | 80            | 6          | 10                    |
| 3        | 80            | 4          | 15                    |
| 4        | 40            | 6          | 20                    |
| 5        | 60            | 8          | 20                    |
| 6        | 60            | 6          | 15                    |
| 7        | 80            | 6          | 20                    |
| 8        | 60            | 6          | 15                    |
| 9        | 60            | 8          | 10                    |
| 10       | 60            | 6          | 15                    |
| 11       | 40            | 4          | 15                    |
| 12       | 60            | 6          | 15                    |
| 13       | 60            | 4          | 20                    |
| 14       | 60            | 4          | 10                    |
| 15       | 80            | 8          | 15                    |
| 16       | 60            | 6          | 15                    |
| 17       | 40            | 6          | 10                    |

**Table S2.** Experimental design for bound phenolic extractions.

| RunOrder | Amplitude (%) | Time (min) | NaOH concentration (M) |
|----------|---------------|------------|------------------------|
| 1        | 40            | 6          | 1.0                    |
| 2        | 60            | 8          | 1.0                    |
| 3        | 60            | 8          | 1.0                    |
| 4        | 60            | 6          | 0.5                    |
| 5        | 60            | 8          | 1.0                    |
| 6        | 60            | 6          | 1.5                    |
| 7        | 60            | 10         | 0.5                    |
| 8        | 80            | 10         | 1.0                    |
| 9        | 80            | 8          | 1.5                    |
| 10       | 60            | 10         | 1.5                    |
| 11       | 80            | 6          | 1.0                    |
| 12       | 60            | 8          | 1.0                    |
| 13       | 40            | 8          | 0.5                    |
| 14       | 40            | 10         | 1.0                    |
| 15       | 60            | 8          | 1.0                    |
| 16       | 80            | 8          | 0.5                    |
| 17       | 40            | 8          | 1.5                    |

**Table S3.** Determination of levels of extraction variable for free phenolics.

| Amplitude (%) | Time (mins) | Solvent-solid ratio | TPC (mg GAE/g) | TPhC (mg PGE/g) | DPPH (mg TE/g) |              |
|---------------|-------------|---------------------|----------------|-----------------|----------------|--------------|
| 20            | 4           | 10:1                | 16.83 ± 1.46   | 1.32 ± 0.09     | 39.14 ± 1.58   |              |
| 40            |             |                     | 18.08 ± 1.00   | 1.56 ± 0.13     | 50.43 ± 2.50   |              |
| 60            |             |                     | 19.68 ± 1.13   | 1.64 ± 0.09     | 47.07 ± 0.74   |              |
| 80            |             |                     | 23.16 ± 1.15   | 1.16 ± 0.8      | 58.11 ± 2.24   |              |
| 100           |             |                     | 20.15 ± 1.39   | 1.33 ± 0.10     | 43.16 ± 0.47   |              |
| 40            | 2           |                     | 15.58 ± 0.99   | 0.41 ± 0.02     | 36.96 ± 0.84   |              |
|               | 6           |                     | 18.36 ± 0.10   | 1.16 ± 0.01     | 45.95 ± 2.68   |              |
|               | 8           |                     | 20.58 ± 1.34   | 1.45 ± 0.11     | 51.72 ± 0.46   |              |
|               | 10          |                     | 23.22 ± 1.63   | 1.44 ± 0.09     | 38.65 ± 1.95   |              |
|               | 4           |                     | 15:1           | 25.08 ± 1.69    | 1.79 ± 0.06    | 88.49 ± 0.27 |
|               |             |                     | 20:1           | 17.5 ± 0.37     | 1.00 ± 0.08    | 56.07 ± 0.40 |
|               |             |                     | 25:1           | 16.28 ± 0.84    | 0.25 ± 0.01    | 94.61 ± 4.21 |
|               |             |                     | 30:1           | 14.7 ± 1.04     | 1.63 ± 0.05    | 96.16 ± 2.26 |

**Table S4.** Determination of levels of extraction variable for bound phenolics.

| Amplitude (%) | Time (mins) | NaOH concentration | TPC (mg GAE/g) | TPhC (mg PGE/g) | DPPH (mg TE/g) |             |
|---------------|-------------|--------------------|----------------|-----------------|----------------|-------------|
| 20            | 4           | 2.0                | 5.88 ± 0.21    | 0.48 ± 0.01     | 7.33 ± 0.18    |             |
| 40            |             |                    | 5.91 ± 0.02    | 0.61 ± 0.02     | 7.20 ± 0.12    |             |
| 60            |             |                    | 6.39 ± 0.32    | 0.62 ± 0.02     | 7.40 ± 0.22    |             |
| 80            |             |                    | 6.53 ± 0.18    | 0.65 ± 0.02     | 7.81 ± 0.27    |             |
| 100           |             |                    | 6.41 ± 0.02    | 0.53 ± 0.02     | 7.67 ± 0.26    |             |
| 40            | 6           |                    | 6.66 ± 0.41    | 0.70 ± 0.01     | 7.48 ± 0.33    |             |
|               | 8           |                    | 6.73 ± 0.41    | 0.85 ± 0.02     | 7.06 ± 0.08    |             |
|               | 10          |                    | 6.20 ± 0.63    | 0.69 ± 0.06     | 6.69 ± 0.07    |             |
|               | 12          |                    | 6.09 ± 0.24    | 0.66 ± 0.01     | 6.81 ± 0.02    |             |
|               | 4           |                    | 0.5            | 7.01 ± 0.02     | 0.79 ± 0.01    | 8.05 ± 0.50 |
|               |             |                    | 1.0            | 7.22 ± 0.02     | 0.93 ± 0.02    | 8.70 ± 0.02 |
|               |             |                    | 1.5            | 6.00 ± 0.17     | 0.69 ± 0.06    | 7.39 ± 0.15 |
|               |             |                    | 2.0            | 5.91 ± 0.02     | 0.61 ± 0.02    | 7.20 ± 0.12 |

**Table S5.** Regression equation and correlation coefficient of reference phenolic compounds studied.

| Compound name         | RT (min) | Wavelength (nm) | Regression Equation  | Correlation coefficient (r) |
|-----------------------|----------|-----------------|----------------------|-----------------------------|
| Phloroglucinol        | 17.576   | 254             | y = 1.7721x - 5.7251 | 0.994                       |
| Gallic acid           | 21.37    | 280             | y = 2.2745x - 6.333  | 0.980                       |
| 4-hydroxybenzoic acid | 41.844   | 254             | y = 62.27x + 131.23  | 0.991                       |
| Catechin              | 49.769   | 254             | y = 41.401x + 56.597 | 0.992                       |
| Chlorogenic acid      | 52.424   | 320             | y = 13.421x - 13.635 | 0.997                       |
| Syringic acid         | 55.544   | 254             | y = 15.567x + 21.217 | 0.998                       |
| Epicatechin           | 61.998   | 254             | y = 1.2394x - 0.4619 | 0.990                       |
| Epigallocatechin      | 64.629   | 280             | y = 7.313x + 3.3     | 0.998                       |
| Sinapic acid          | 79.016   | 320             | y = 29.514x - 51.96  | 0.984                       |

\* RT: retention time.
